# Supplementary material for: Sex-Specific Effects of Dietary Methionine Restriction on the Intestinal Microbiome
Source: MDPI journal article supplement (doi:10.3390/nu12030781), 2020-03-16
Supplement: s1 [file s1]

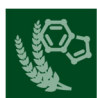

**Table 1.** Nutritional characteristics of the methionine-adequate (TD.140520) and methionine-restricted (TD.160240) diets used in the study.

| Formula                      | TD.140520<br>g/kg | TD.160240<br>g/kg |
|------------------------------|-------------------|-------------------|
| Sucrose                      | 445.297           | 448.98            |
| Corn Starch                  | 198.783           | 200               |
| Corn Oil                     | 100               | 100               |
| Cellulose                    | 30                | 30                |
| Mineral Mix, AIN-76 (170915) | 35                | 35                |
| Calcium Phosphate, dibasic   | 3                 | 3                 |
| L-Alanine                    | 3.5               | 3.5               |
| L-Arginine HCl               | 12.1              | 12.1              |
| L-Asparagine                 | 6                 | 6                 |
| L-Aspartic Acid              | 3.5               | 3.5               |
| L-Cystine                    | 3.5               | 3.5               |
| L-Glutamic Acid              | 40                | 40                |
| Glycine                      | 23.3              | 23.3              |
| L-Histidine HCl, monohydrate | 4.5               | 4.5               |
| L-Isoleucine                 | 8.2               | 8.2               |
| L-Leucine                    | 11.1              | 11.1              |
| L-Lysine HCl                 | 18                | 18                |
| L-Methionine                 | 6.5               | 1.5               |
| L-Phenylalanine              | 7.5               | 7.5               |
| L-Proline                    | 3.5               | 3.5               |
| L-Serine                     | 3.5               | 3.5               |
| L-Threonine                  | 8.2               | 8.2               |
| L-Tryptophan                 | 1.8               | 1.8               |
| L-Tyrosine                   | 5                 | 5                 |
| L-Valine                     | 8.2               | 8.2               |
| Vitamin Mix, Teklad (40060)  | 10                | 10                |
| Ethoxyquin, antioxidant      | 0.02              | 0.02              |
| % by weight                  |                   |                   |
| Protein                      | 15.3              | 16.6              |
| CHO                          | 63.3              | 63.7              |
| Fat                          | 10                | 10                |

\*- Vitamin Mix, w/o choline, A, D, E; Vitamin E, DL-alpha tocopheryl acetate (500 IU/g; 0.242 g/kg); Vitamin A Palmitate (500,000 IU/g; 0.0396 g/kg); Vitamin D3, cholecalciferol (500,000 IU/g; 0.0044 g/kg).
