# Supplementary figures and images for: Sex-Specific Effects of Dietary Methionine Restriction on the Intestinal Microbiome
Source: MDPI journal article supplement (doi:10.3390/nu12030781), 2020-03-16

Figure S2: Metabolites in liver

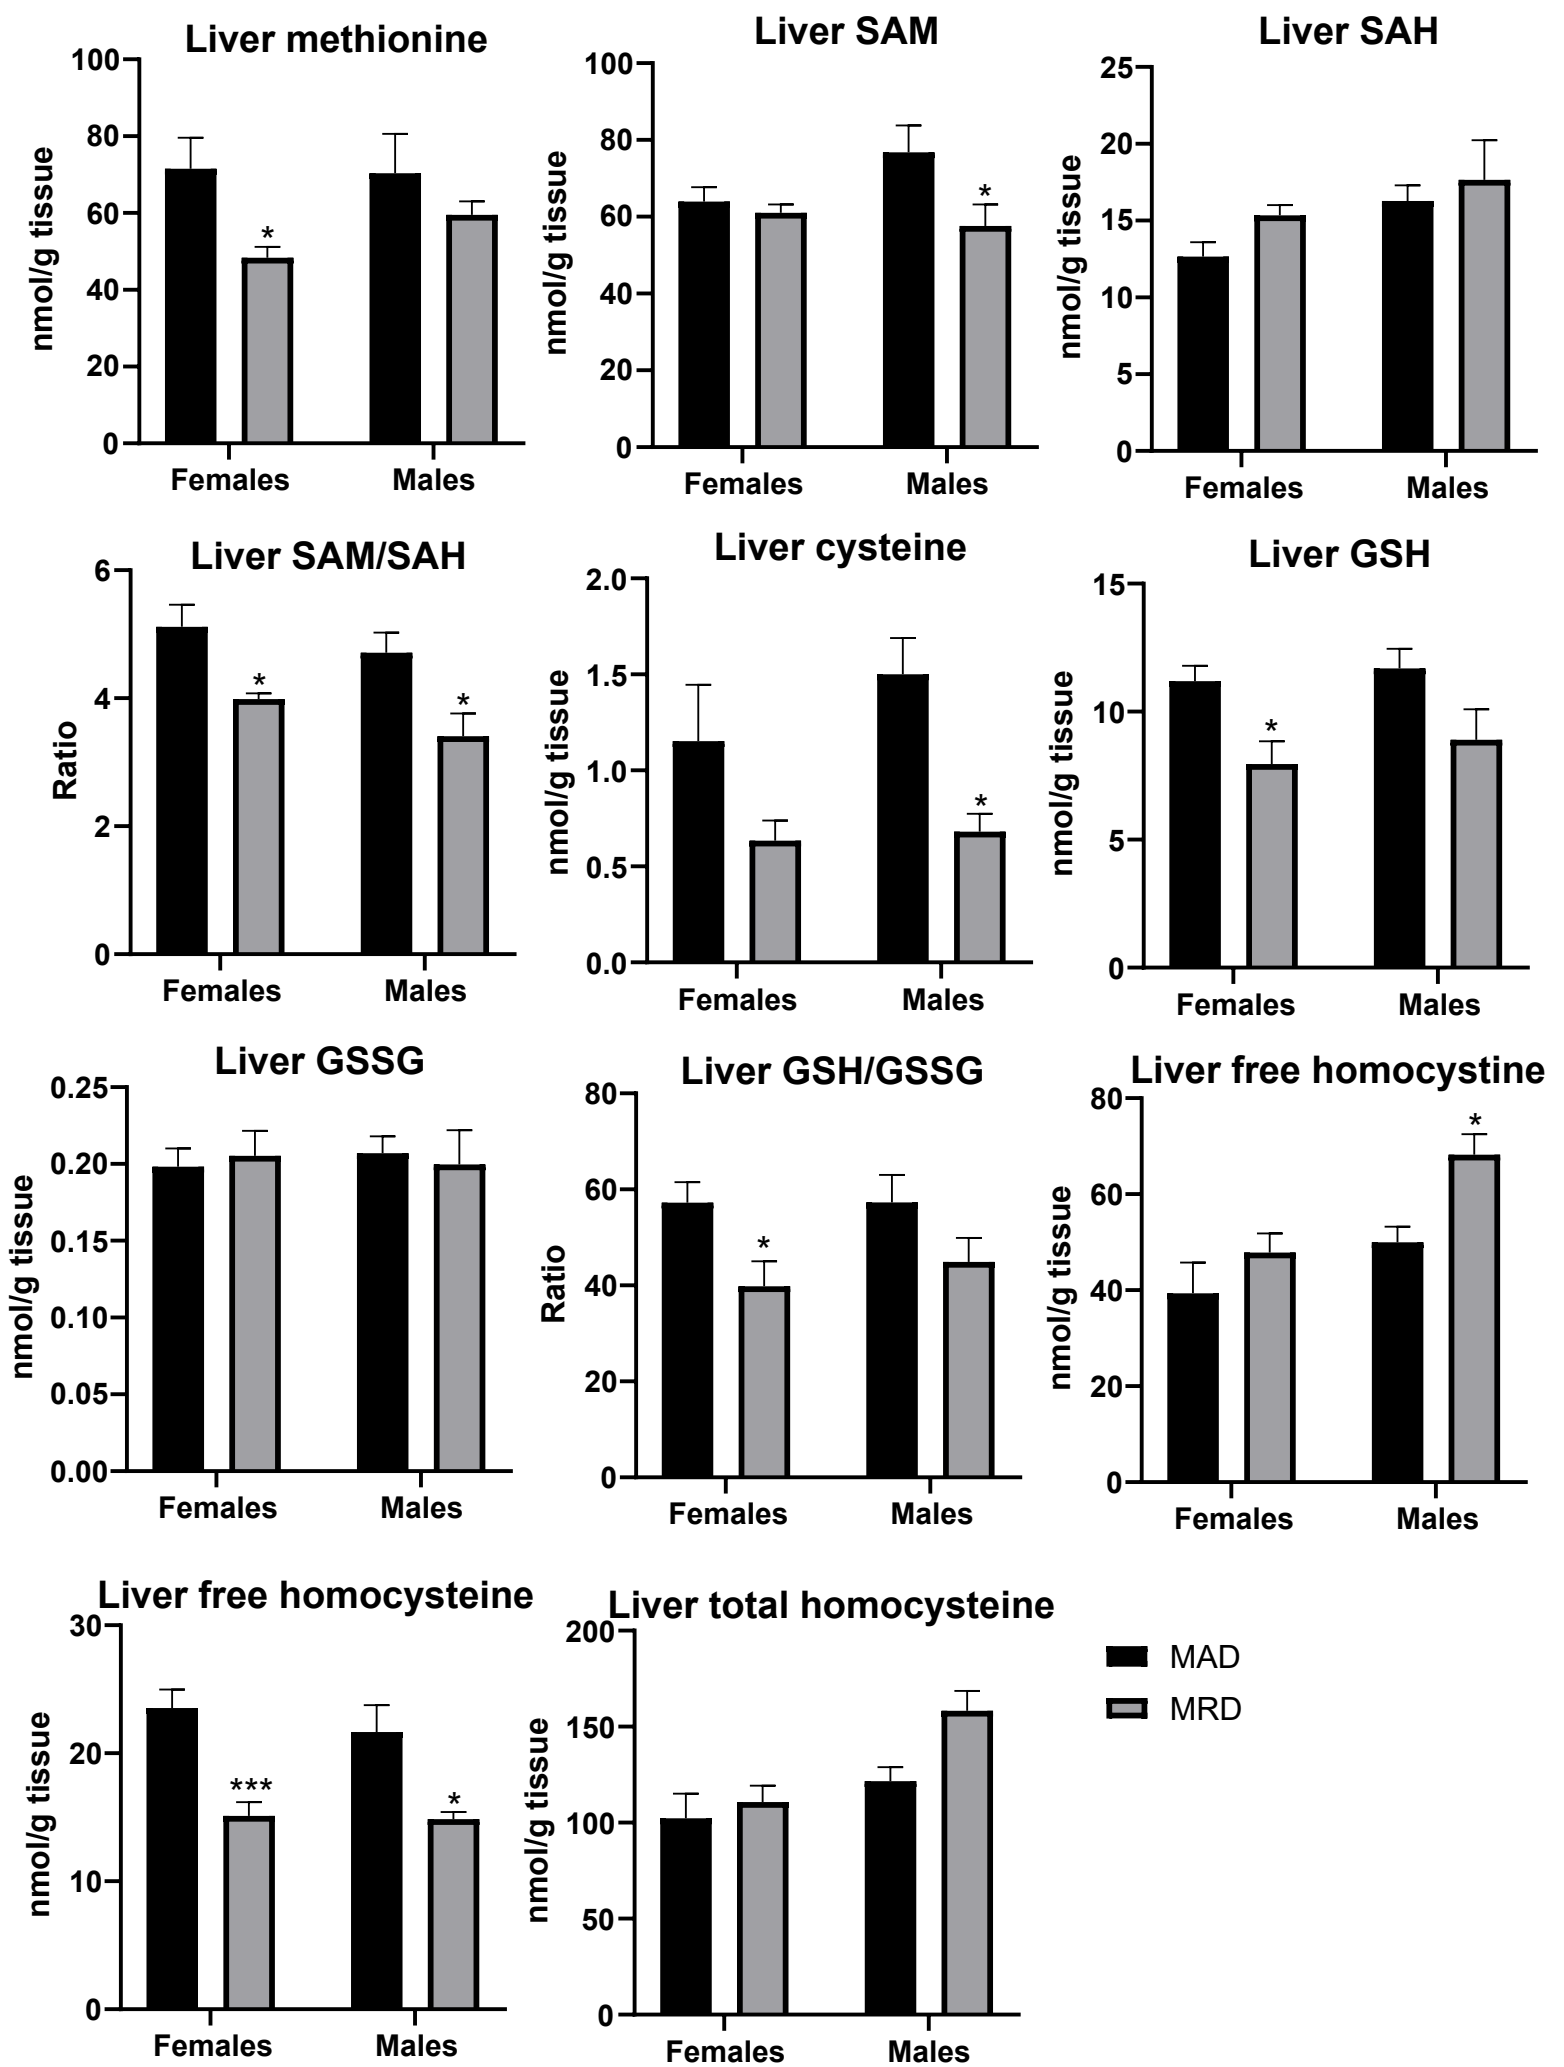

Supplement: s1 [file s1]

Figure S1: Metabolites in serum

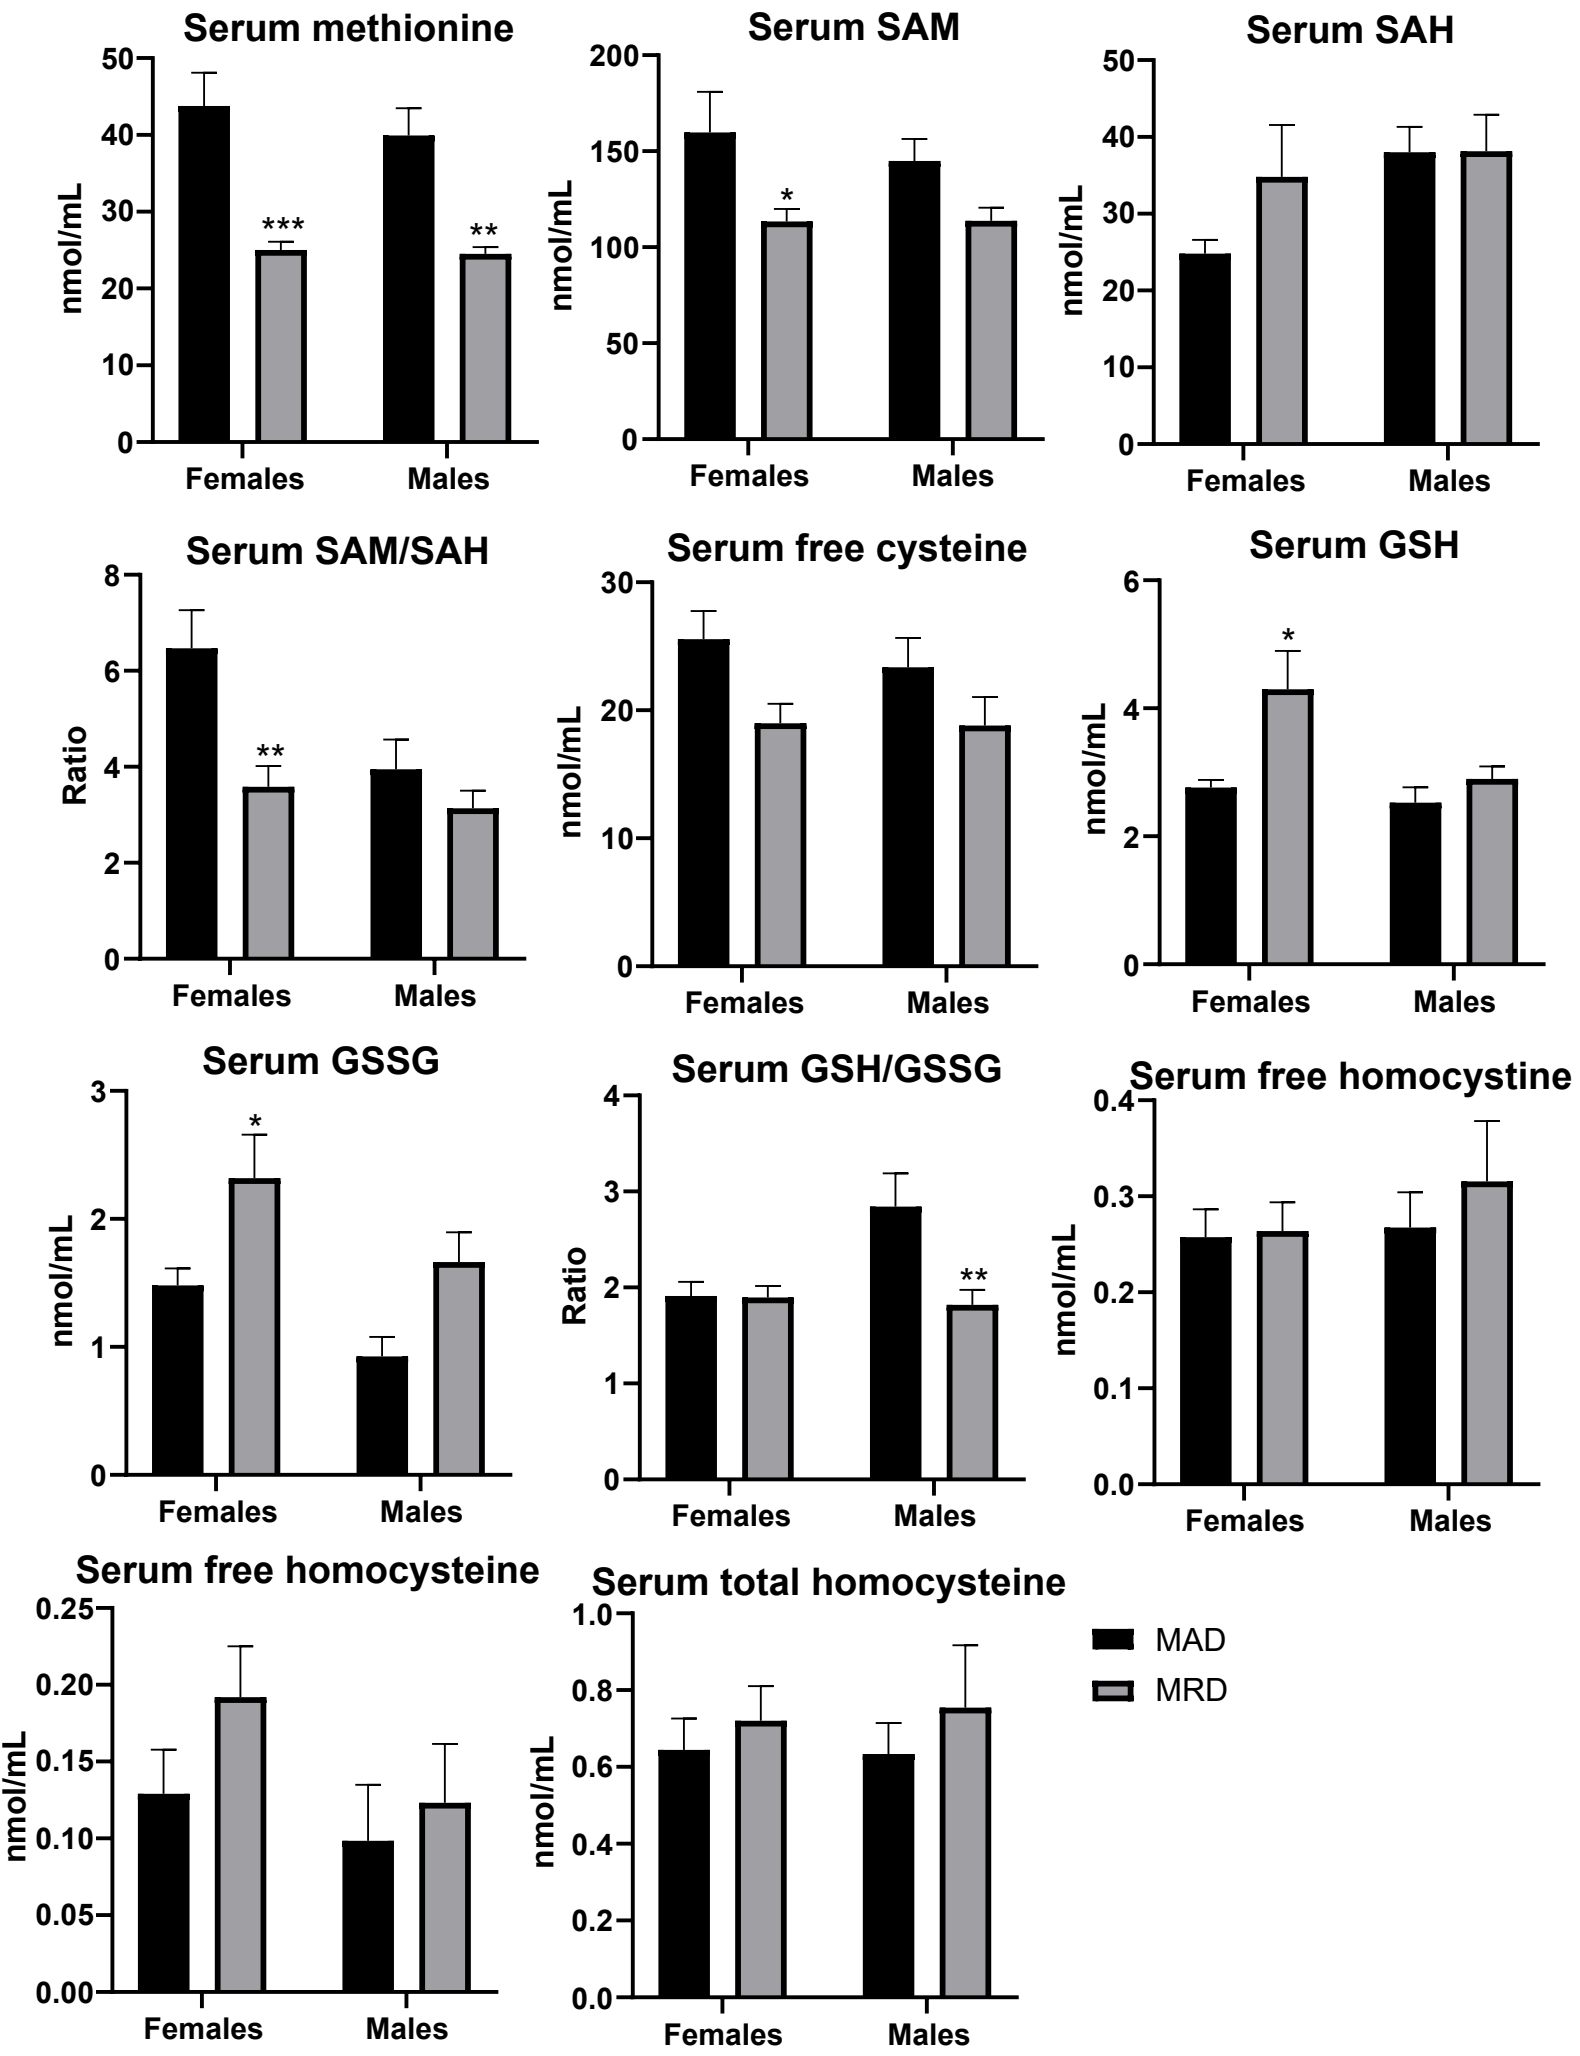

Supplement: s1 [file s1]
